# Supplementary material
Source: PubMed Central journal article supplement (PMC9044943)
Supplement: jvi.02013-21-s0001.pdf [file jvi.02013-21-s0001.pdf]

Figure S1

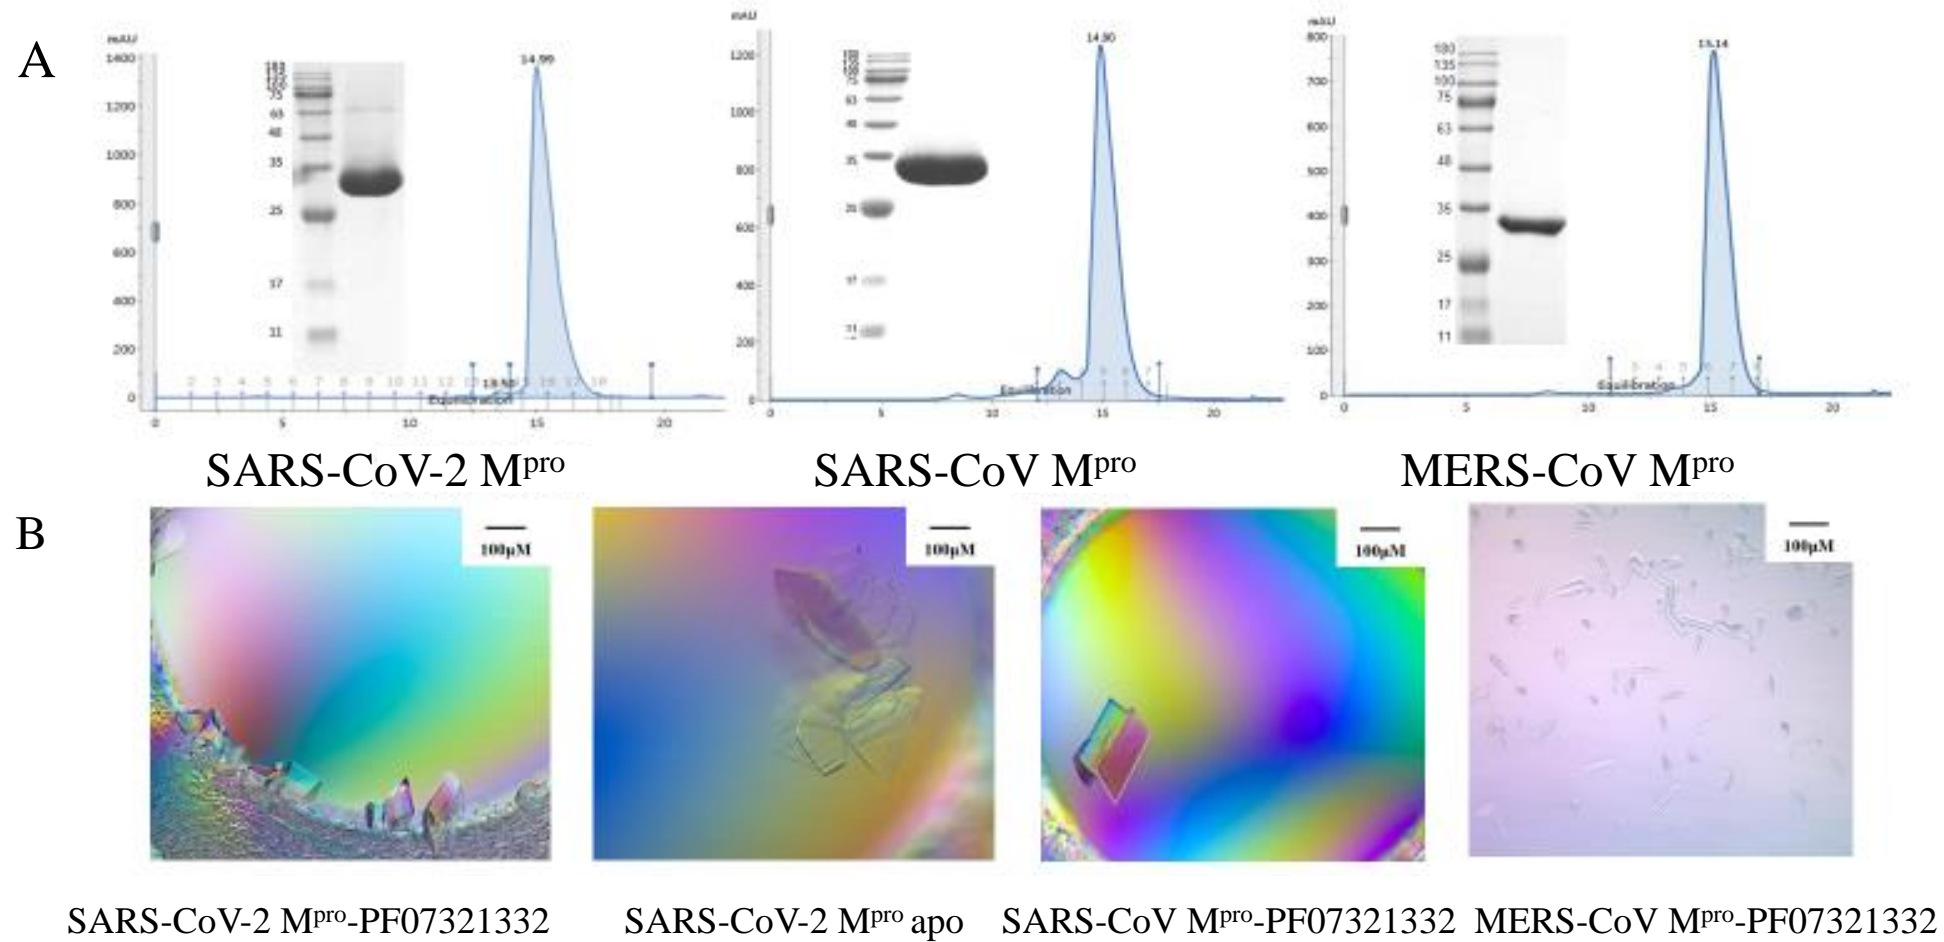

Figure S1 A Purification of human CoVs . B Crystals of SARS-Cov-2 and human CoVs with PF07321332.

Figure S2

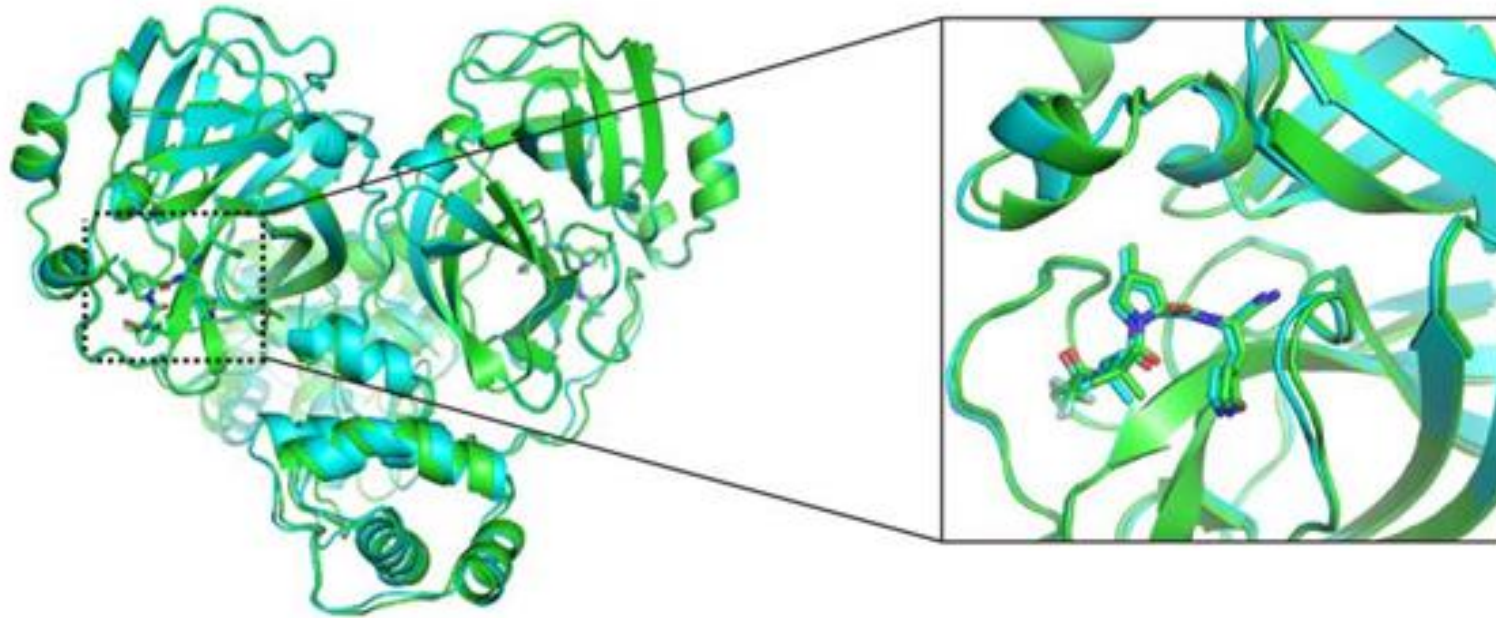

Figure S2 Structural comparison of PF-07321332/SARS-CoV-2 M<sup>pro</sup> complexes obtained by [cocrystallization](#) (green) with soaking (cyan).

Figure S3

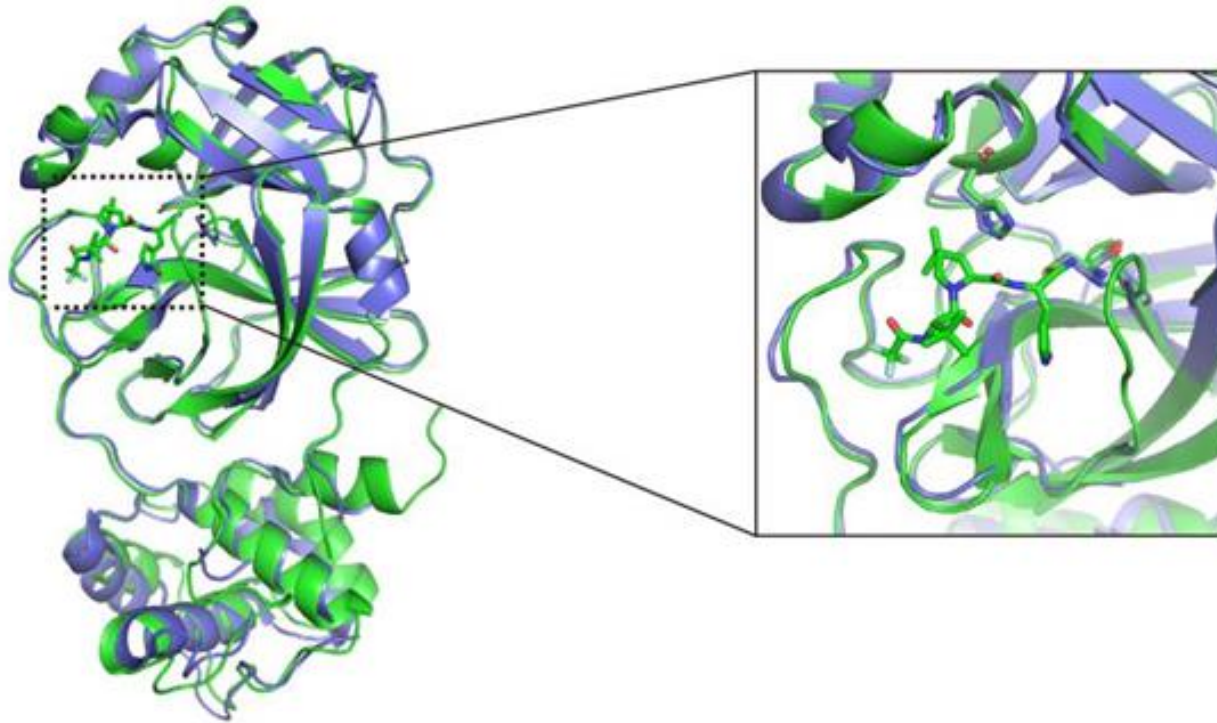

Figure S3 Structural comparison of PF-07321332/SARS-CoV-2 M<sup>pro</sup> complexes obtained by [cocrySTALLIZATION](#) (green) with apo M<sup>pro</sup> (slate).

Table S1

Table S1 Summarize of recently reported covalent inhibitors against SARS-CoV-2 M<sup>pro</sup>.

| Inhibitors  | Inhibitory activity against SARS-CoV-2 M <sup>pro</sup> | Crystal structure in complex with SARS-CoV-2 M <sup>pro</sup> (PDB ID) | Reference |
|-------------|---------------------------------------------------------|------------------------------------------------------------------------|-----------|
| N3          | $k_3/K_i = 11,300 \pm 880 \text{ M}^{-1}$               | 6LU7                                                                   | 12        |
| 13b         | $IC_{50} = 0.67 \pm 0.18 \mu\text{M}$                   | 6Y2F                                                                   | 14        |
| 11a         | $IC_{50} = 0.053 \pm 0.005 \mu\text{M}$                 | 6LZE                                                                   | 6         |
| Boceprevir  | $IC_{50} = 8.0 \mu\text{M}$                             | 7BRP                                                                   | 24        |
| Carmofur    | $IC_{50} = 1.82 \mu\text{M}$                            | 7BUY                                                                   | 17        |
| GC376       | $IC_{50} = 0.15 \mu\text{M}$                            | 7D1M                                                                   | 24        |
| 5h          | $K_i = 17.6 \pm 3.2 \text{ nM}$                         | 7JKV                                                                   | 25        |
| MPI3        | $IC_{50} = 8.5 \pm 1.5 \text{ nM}$                      | 7JQO                                                                   | 27        |
| PF-07321332 | $IC_{50} = 0.023 \mu\text{M}$                           | 7VLQ                                                                   | This      |
